# Supplementary material for: Urinary TERT promoter mutations are detectable up to 10 years prior to clinical diagnosis of bladder cancer: Evidence from the Golestan Cohort Study
Source: PubMed Central journal article supplement — eBioMedicine. 2020 Feb 17;53:102643. doi: 10.1016/j.ebiom.2020.102643 (PMC7118568; doi:10.1016/j.ebiom.2020.102643), 2020-02-17
Supplement: mmc1.pdf [file mmc1.pdf]

## Supplementary data

### Materials and Methods

**Supplementary Table 1. Demographics of all participants of the Golestan Cohort Study (n=50,045).**

| Age (years)               | Number (%)     |
|---------------------------|----------------|
| mean ± standard deviation | 52.1 ± 8.9     |
| <b>Sex</b>                |                |
| Male                      | 21,234 (42.4%) |
| Female                    | 28,811 (57.6%) |
| <b>Ethnicity</b>          |                |
| Turkman                   | 37,253 (74.4%) |
| Non-Turkman               | 12,792 (25.6%) |
| <b>Residence</b>          |                |
| Rural                     | 40,011 (80.0%) |
| Urban                     | 10,034 (20.1%) |
| <b>Formal education</b>   |                |
| No                        | 35,118 (70.2%) |
| Yes                       | 14,927 (29.8%) |
| <b>Tobacco use</b>        |                |
| Never                     | 41,388 (82.7%) |
| Ever                      | 8,657 (17.3%)  |
| <b>Opium use</b>          |                |
| Never                     | 41,537 (83.0%) |
| Ever                      | 8,508 (17.0%)  |
| <b>Alcohol drinking</b>   |                |
| Never                     | 48,316 (96.6%) |
| Ever                      | 1,729 (3.5%)   |

### UroMuTERT assay and mutation analysis

A single amplicon of 147bp covering the two hotspot mutations in the *TERT* promoter region (C228T and C250T mutations) was designed for the NGS assay. The sequences of the forward and reverse primers for the *TERT*-NGS amplicon are 5'-CTTCCAGCTCCGCCTCCTCCGCGCGG-3' and 5'-AGCGCTGCCTGAAACTCGCGCC-3' respectively.

Amplification of 5 ng urinary DNA and 10ng buffy coat DNA was performed in a PCR reaction mix containing 5X custom Buffer, 100 nM forward and reverse primers and 0.04 U/mL of AccuStart HiFi Taq Polymerase (Quanta BioSciences). PCR condition was: 98°C for 10 min, 50 cycles of 98°C for 30sec, 70°C for 30sec, and 72°C for 40 sec followed by 72°C for 5min and then kept at hold at 12°C.

Barcoded libraries were prepared from the amplified products as previously described.<sup>1</sup> The libraries were purified using magnetic beads and size-specific amplicons were extracted using the gel purification method. Ion

OneTouch 2 system and the Ion PI Hi-Q OT2 200 Kit (Thermo Fisher Scientific) were used to perform the emulsion PCR of the 7 $\mu$ L of 100pM purified library. Finally, the sequencing reaction was performed on an Ion Proton System (Thermo Fisher Scientific) using Life Technologies' Ion PI™ Chip Kit v3 and Ion PI™ Hi-Q™ Sequencing 200 Kit (Thermo Fisher Scientific).

The data from the NGS run in the ion proton system was analysed using our in house developed Needlestack multi-sample variant caller pipeline (Github: <https://github.com/IARCbioinfo/needlestack>).<sup>2</sup> Needlestack models sequencing errors using a negative binomial regression at each target position and target variant. Then the mutations are detected as being outliers from the regression model. A p-value for being a mutation is calculated for each position and then transformed into q-values (QVAL) to account for multiple testing. A QVAL of 20 was used as a threshold for calling mutations and we present here the needlestack plots for each position where we detected mutations in the urinary DNA (**Supplementary Figure 1**).

To control for potential low-allelic fraction amplification artifacts or sequencing errors, all DNA samples with evidence for a *TERT* mutation (QVAL>20) were re-sequenced as a technical duplicate. These samples, as well as sufficient wild type samples to ensure appropriate model fit were then reanalyzed using re-amplified, re-sequenced independent barcoded libraries and analyzed with Needlestack algorithm. Samples with confirmed QVAL>20 were retained after UroMuTERT analysis (**Figure 1**).

#### **ddPCR assay and mutation analysis**

We developed droplet digital PCR (ddPCR) assays for the four *TERT* promoter mutations observed in our study: C228T, C228A, CC242-243TT and C250T. The probes were custom designed probes from Biorad. The sequences of the probe are given in **Supplementary Table 2**.

All mutation positive samples after UroMuTERT analysis were considered for technical validation using droplet digital PCR (ddPCR). Ten wild type samples chosen at random were included for technical controls. We have developed and validated ddPCR assays for the two most common *TERT* promoter mutations: C228T and C250T. Briefly, a 22  $\mu$ L reaction mix was prepared using 10ng of urinary DNA as a template, 11  $\mu$ L of 2x ddPCR supermix-no dUTP (Biorad), 1.1  $\mu$ L of 20x FAM and HEX probes for mutated and wildtype alleles, 1.1  $\mu$ L of RsaI restriction enzyme (10 U/  $\mu$ L) and 0.2  $\mu$ L of 7-deaza-dGTP, Li-salt (2  $\mu$ M). The droplets were generated using the autoDG droplet generator (Biorad). The PCR amplifications of the droplets were carried out separately for the C228T and C250T assays using the following PCR conditions: 95°C for 10 min, 40 cycles of 94°C for 30sec, ramp 2.5/sec, 54°C for C228T assay (55°C for C228A and CC242-243TT assays and 64°C for C250T assay) for 30 sec followed by 98°C for 10min and then kept at hold at 12°C. The fluorescent intensity of each

droplet was measured using the droplet reader QX200 (Biorad). Analysis of the ddPCR data was performed using the QuantaSoft™ Analysis Pro 1.0.596 software from Biorad (**Supplementary Figure 2**). All the samples for this study were run in duplicates using 10ng of DNA derived from the urine samples, and the average fractional abundance of the duplicates was considered. The 2D amplitude plots from the QuantaSoft™ analysis pro software were analyzed by setting the threshold amplitudes for both the mutated and wild type channels. The 2D amplitude plots from the QuantaSoft™ analysis pro software were analyzed by setting the threshold amplitudes for both the mutated and wild type channels. The thresholds for the channel 1 (mutated probe) for the C228A, C228T, CC242-243TT and C250T probes were 700, 1500, 500 and 3500 respectively. For the channel 2 (wild type probe) the thresholds for C228A, C228T, CC242-243TT and C250T probes were 1250, 1750, 1440 and 2000 respectively. A minimum number of 5 or 6 positive droplets (mutated blue droplets above the Channel 1 thresholds) were considered to be positive in ddPCR for C228A/C250T and C228T/CC242-243TT assays respectively. All laboratory analyses were conducted blindly to the case or control status of the samples.

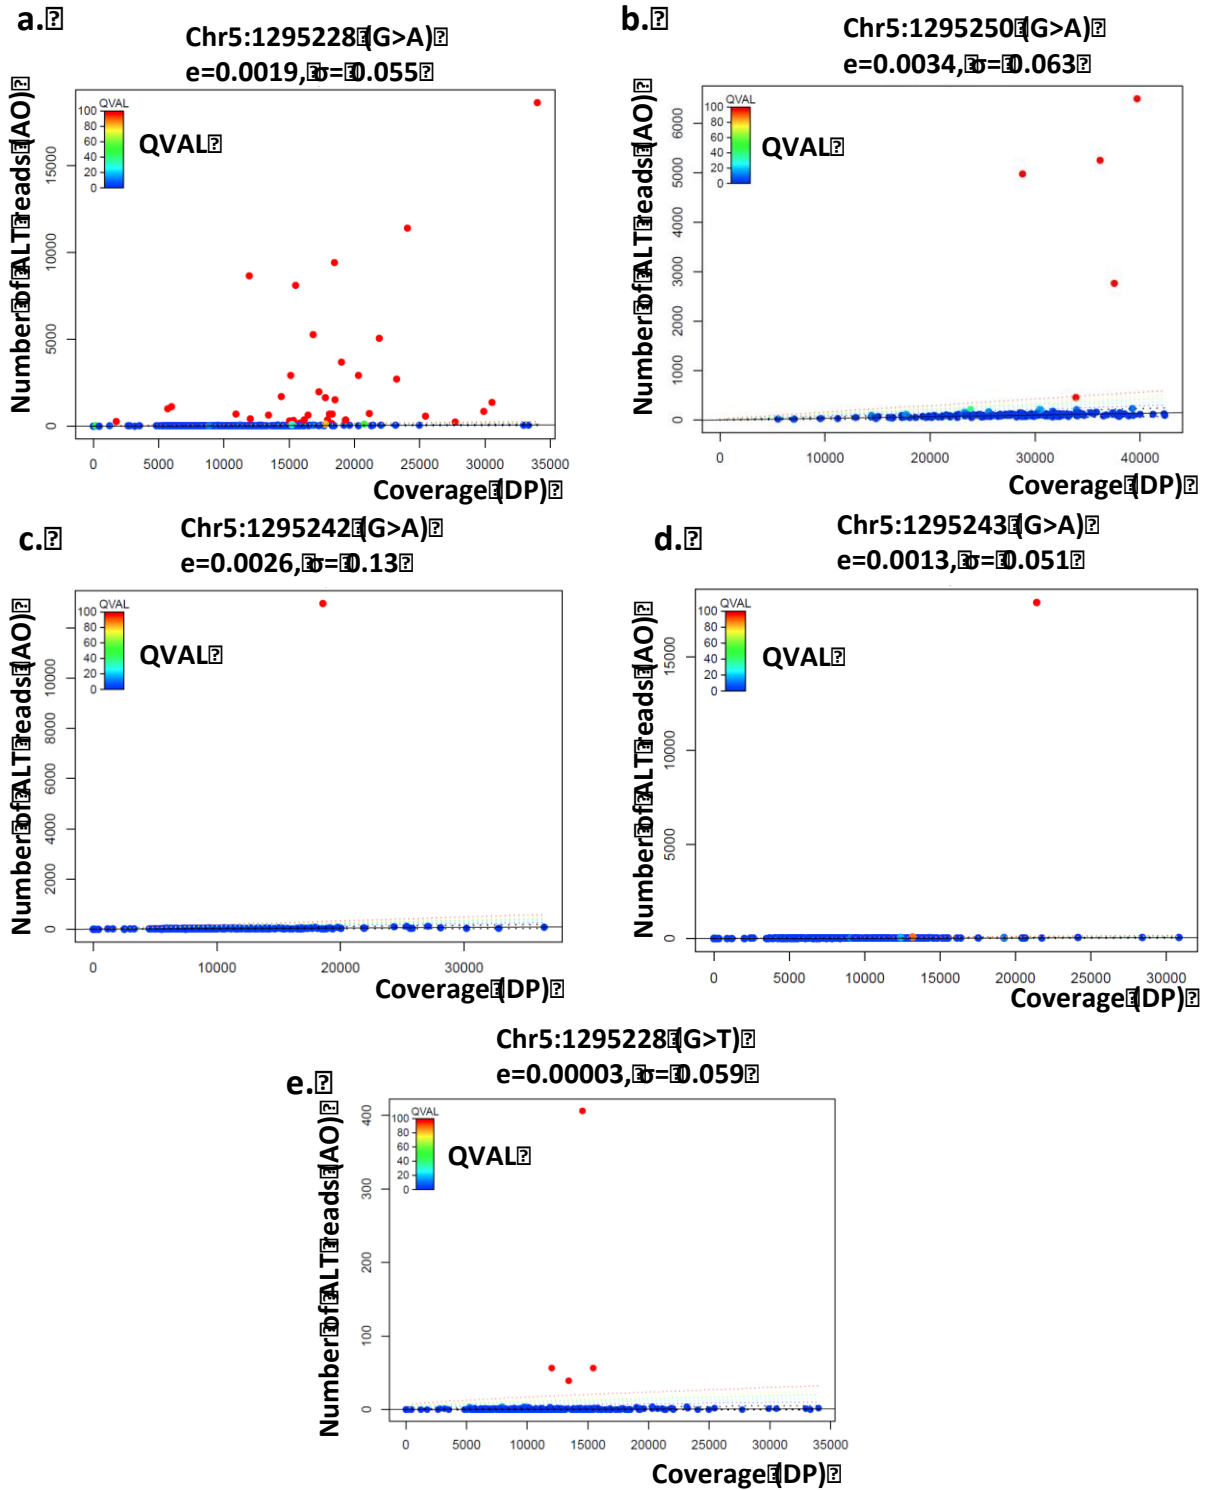

Supplementary Figure 1. Example of Needlestack plots for *TERT* promoter mutations detection. The Needlestack plots for the different types of *TERT* promoter mutations C228T (a), C250T (b), CC242-243TT (c and d), and C228A (e). The number of altered reads is plotted against the depth of sequencing (coverage). QVAL=20 is used as threshold to call mutations.

**Supplementary Table 2. Probes for detecting *TERT* promoter mutations with ddPCR assays.**

| Mutation type           | Primer/probe | Sequence (5' to 3')           | Fluorescent Dye |
|-------------------------|--------------|-------------------------------|-----------------|
| <i>TERT</i> C228T       | fw_primer    | CCCTCCCGGGTCC                 | -               |
|                         | rev_primer   | CCGCGGAAAGGAAGG               | -               |
|                         | wt_probe     | CGGA <sub>g</sub> GGGGCTGG    | HEX_IowaBlack   |
|                         | mut_probe    | CCCGGA <sub>a</sub> GGGGCTG   | FAM_IowaBlack   |
| <i>TERT</i> C250T       | fw_primer    | CTTCACCTTCCAGCTCC             | -               |
|                         | rev_primer   | GAGGGCCCGGAGG                 | -               |
|                         | wt_probe     | ACCCGG <sub>g</sub> AGGGGT    | HEX_IowaBlack   |
|                         | mut_probe    | CCCGGA <sub>a</sub> AGGGGTCCG | FAM_IowaBlack   |
| <i>TERT</i> C228A       | fw_primer    | CGCGGAAAGGAAGGG               | -               |
|                         | rev_primer   | CCCCTCCCGGGTC                 | -               |
|                         | wt_probe     | CGGA <sub>g</sub> GGGGCTGG    | HEX_IowaBlack   |
|                         | mut_probe    | CCCGGA <sub>t</sub> GGGGCTG   | FAM_IowaBlack   |
| <i>TERT</i> CC242-243TT | fw_primer    | GAGGGCCCGGAGG                 | -               |
|                         | rev_primer   | CTTCACCTTCCAGCTCC             | -               |
|                         | wt_probe     | CTGGGCCCG <sub>g</sub> gAC    | HEX_IowaBlack   |
|                         | mut_probe    | CCGGaaACCCGGGA                | FAM_IowaBlack   |

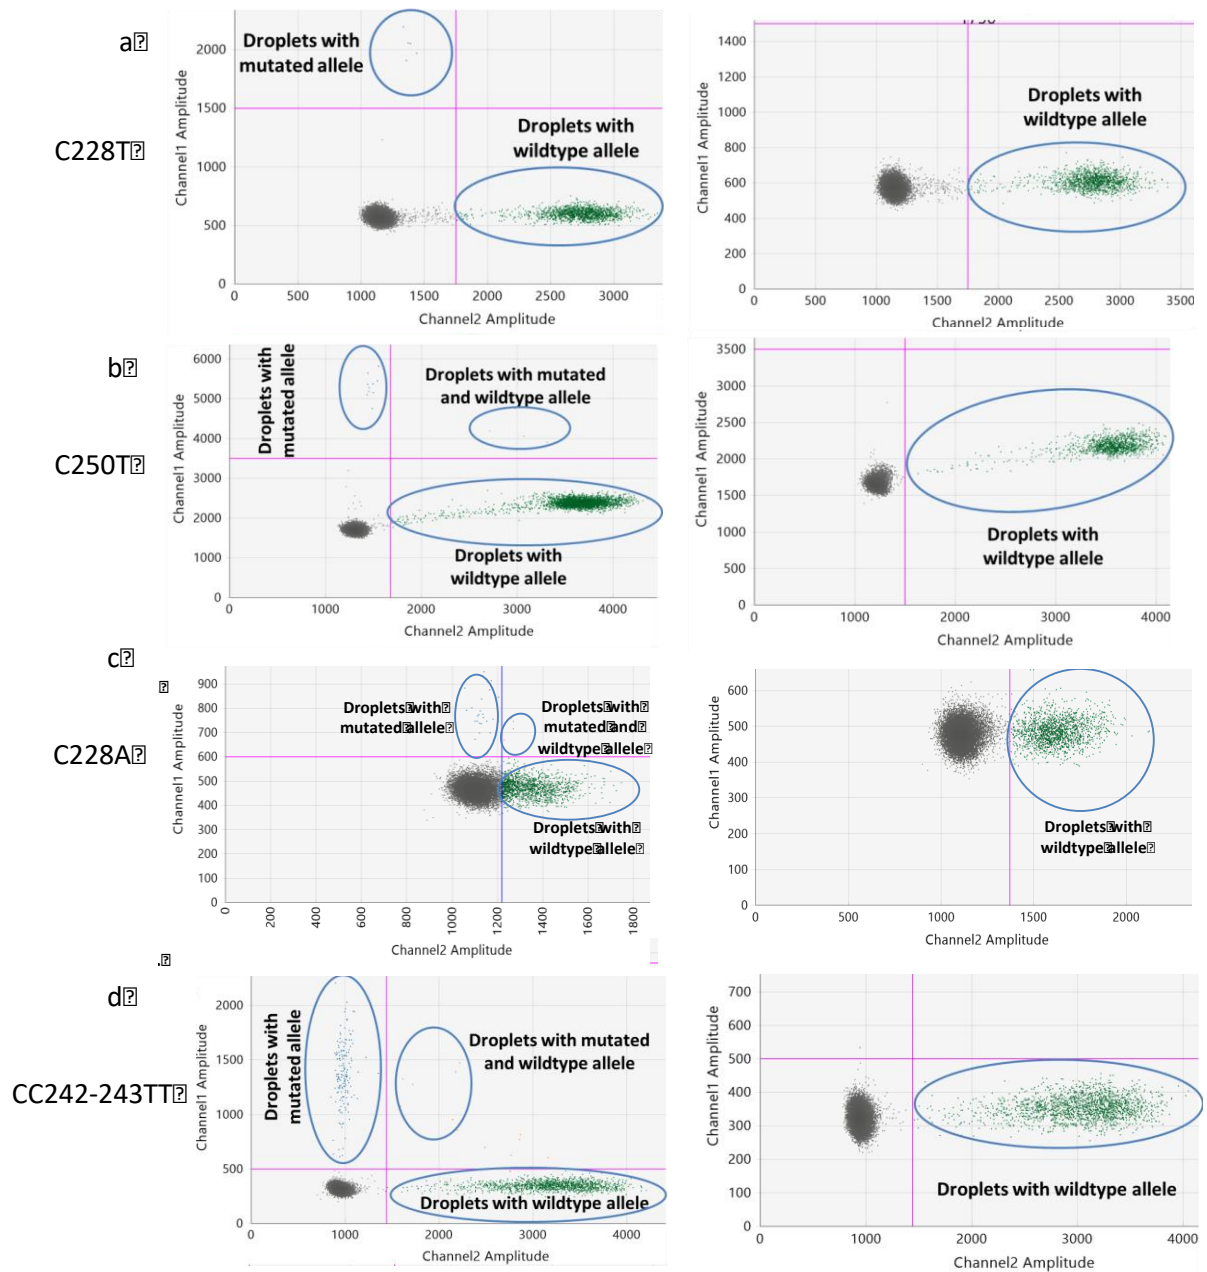

**Supplementary Figure 2.** 2D amplitude plots of *TERT* promoter mutation ddPCR assays in representative samples from the Golestan cohort. Assays testing for C228T (A), C250T (B), C228A (C) and CC242-243TT (D) mutations are displayed in four examples of mutated samples (left panels) and in four examples of wild-type samples (right panels). In the left panel, fluorescent probes (FAM) detect respective mutations as exemplified by the count of droplets with mutated alleles, while in the right panel, wild-type samples do not show any positive droplets (FAM) above the threshold line but show droplets with HEX fluorescence associated with wild-type probes. The pink lines are the thresholds for channel 1 (mutated probe) and channel 2 (wild-type probe) for the ddPCR mutation assays.

## Results

### Urinary DNA concentration

The median volume of urine in the samples analysed (n=188) was 2.9 mL (range: 1.1 - 4.5 mL) and the median DNA concentration was 0.8 ng/ $\mu$ L. The DNA was eluted in a 60 $\mu$ L volume. We obtained an average of 256 ng DNA (median 48 ng; range: 6ng – 7  $\mu$ g). Twelve out of 188 urine samples did not yield any measurable amount of DNA. There was no correlation between the concentration of DNA achieved and the urine volume used (Supplementary Figure 3).

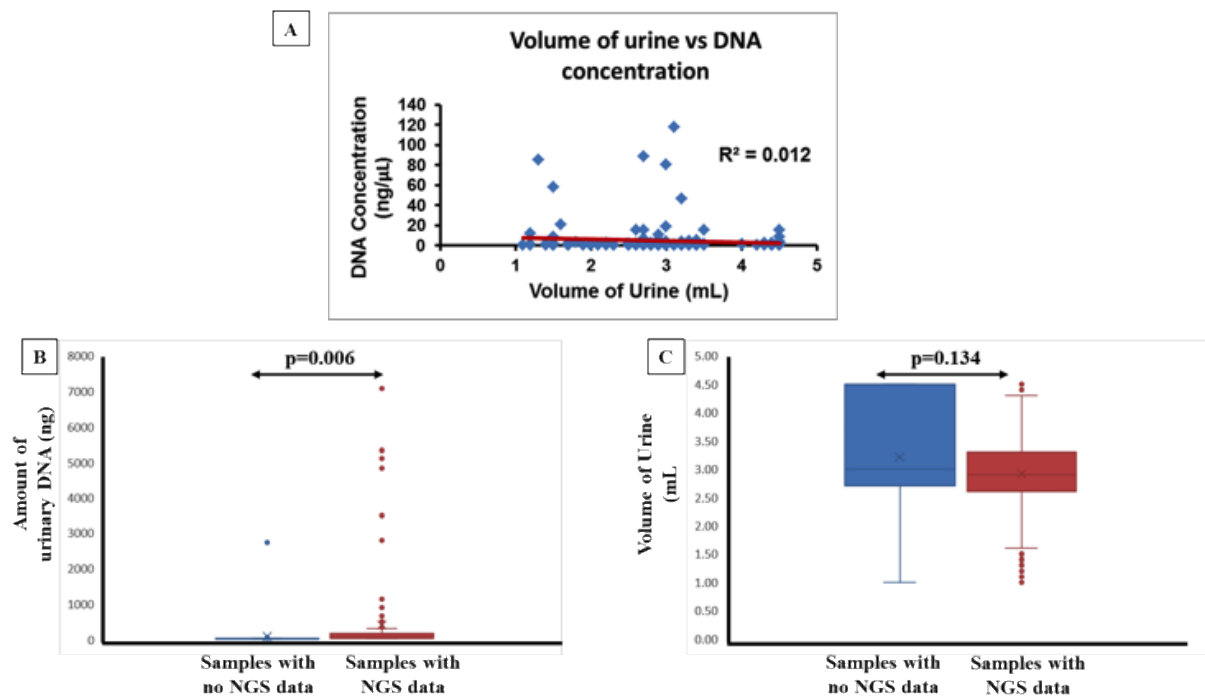

**Supplementary Figure 3. Factors affecting urine DNA concentration and success of the UroMuTERT assay.** Evaluation of the association between urine volume and DNA concentration after DNA isolation (A); the association between the successful NGS reads obtained after *TERT* mutation screening with the UroMuTERT assay and the amount of urinary DNA (B) and the volume of urine (C). Samples with poor or no data (N=57) and samples with data (N=131) are displayed.

**Supplementary Table 3. Proportion of successful UroMuTERT assay according to the calendar year of urine sample collection.**

| Year of Urine Sample Collection | Successful in UroMuTERT, Number (%) | Failed in UroMuTERT, Number (%) | Total, Number |
|---------------------------------|-------------------------------------|---------------------------------|---------------|
| 2004                            | 9 (30.00)                           | 21 (70.00)                      | 30            |
| 2005                            | 21 (58.33)                          | 15 (41.67)                      | 36            |
| 2006                            | 38 (86.36)                          | 06 (13.64)                      | 44            |
| 2007                            | 43 (76.79)                          | 13 (23.21)                      | 56            |
| 2008                            | 20 (90.91)                          | 02 (9.09)                       | 22            |
| Total                           | 131 (69.68)                         | 57 (30.32)                      | 188           |

P-value <0.001 for the difference between the groups.

### Detection of *TERT* promoter mutations in pre-diagnostic urine samples

The urine volume used in this study and the urinary DNA concentration were not associated with the mutant allelic fraction (MAF) of the *TERT* promoter mutations detected in these samples using either ddPCR or UroMuTERT (NGS) approaches (**Supplementary Figure 4**). The MAFs detected using the UroMuTERT (NGS) and ddPCR assays were highly correlated ( $r^2=0.96$ ), (**Supplementary Figure 5**), validating the quantitative measurement of the mutational load by the two methods.

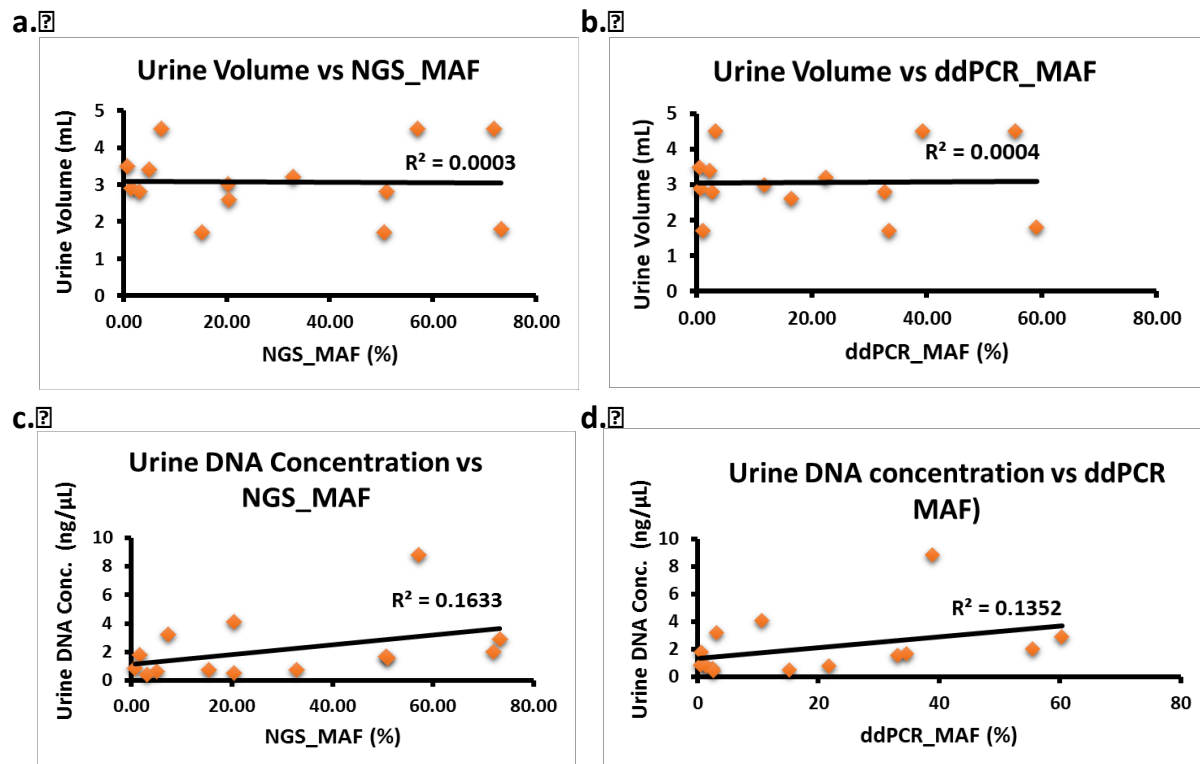

**Supplementary Figure 4. Correlation between urine volume and urine DNA concentration with the mutant allelic fraction (MAF) detected by Next-Generation Sequencing (NGS) assay (a and c respectively) or Digital Droplet PCR (ddPCR) approach (b and d respectively).**



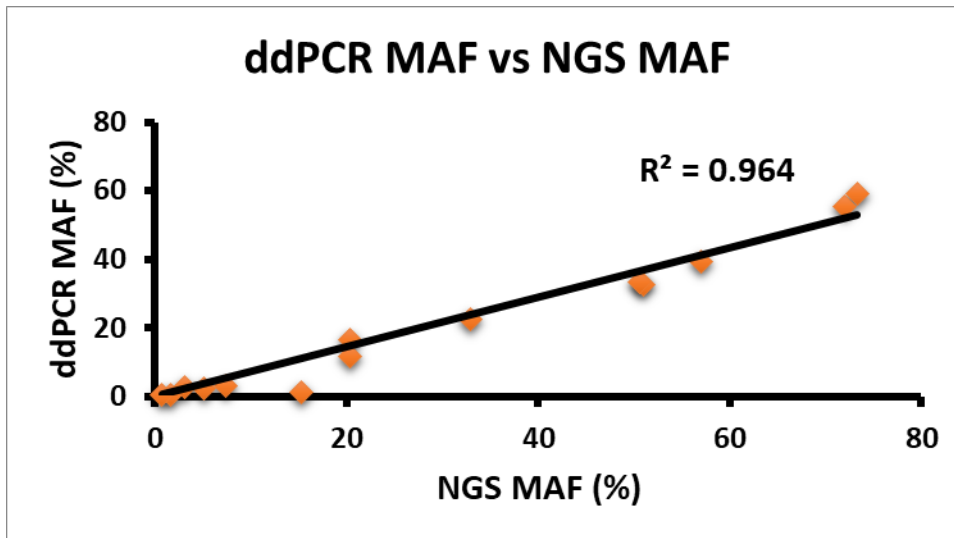

**Supplementary Figure 5** Correlation between Mutant Allelic Fraction (MAF) detected by the Next-generation Sequencing (NGS) and Digital Droplet PCR (ddPCR) based methods.

**Supplementary Table 4. Clinical and *TERT* mutational data of the bladder cancer cases from the Golestan Cohort.**

| Anonymized PID | Sex    | Residence | Time from urine collection to BC Dx (Years) | TERT mutation status | Average NGS MAF (%) | Average ddPCR MAF (%) | Death | Death-Reason                                     | TNM        | Stage | Grade |
|----------------|--------|-----------|---------------------------------------------|----------------------|---------------------|-----------------------|-------|--------------------------------------------------|------------|-------|-------|
| BC16           | Male   | urban     | 10·3                                        | C228T                | 7·3                 | 3·3                   | 1     | Bladder Cancer                                   | T3N1M0     | 3A    | 3     |
| BC09           | Male   | rural     | 2·6                                         | C228T                | 57·1                | 39·2                  | 1     | Bladder Cancer                                   | T1N0M0     | 1     | 3     |
| BC03           | Male   | rural     | 9·1                                         | ND                   | ND                  | ND                    | 1     | Bladder Cancer                                   | T2bN0M0    | 2     | 3     |
| BC02           | Female | urban     | 9·5                                         | ND                   | ND                  | ND                    | 1     | Bladder Cancer                                   | TxNxM1     | 4     |       |
| BC27           | Male   | urban     | 7·3                                         | ND                   | ND                  | ND                    | 0     |                                                  | T1N0M0     | 1     | 1     |
| BC25           | Male   | urban     | 8·1                                         | ND                   | ND                  | ND                    | 0     |                                                  | T1N0M0     | 1     | 1     |
| BC19           | Male   | urban     | 6·7                                         | CC242-243TT          | 72·0                | 55·4                  | 1     | Bladder Cancer                                   | TxNxM1     | 4     | 3     |
| BC26           | Male   | urban     | 7·9                                         | ND                   | ND                  | ND                    | 0     |                                                  | T1N0M0     | 1     | 1     |
| BC21           | Female | urban     | 9·3                                         | ND                   | ND                  | ND                    | 0     |                                                  | TxNxM1     | 4     | 3     |
| BC22           | Male   | rural     | 8·9                                         | ND                   | ND                  | ND                    | 0     |                                                  | NA         |       |       |
| BC15           | Male   | urban     | 9·8                                         | C228A                | 3·1                 | 2·7                   | 1     | Other Symptoms, Signs and Abnormal Findings, NOS | NA         |       |       |
| BC12           | Female | rural     | 8·7                                         | C228T                | 1·6                 | 0·6                   | 1     | Bladder Cancer                                   | T2-3NxM1   | 4     | 3     |
| BC05           | Male   | rural     | 0·4                                         | ND                   | ND                  | ND                    | 1     | Bladder Cancer                                   | Tis        | 0     |       |
| BC14           | Female | rural     | 7·5                                         | ND                   | ND                  | ND                    | 1     | Bladder Cancer                                   | T4bNxM0    | 4A    | 3     |
| BC29           | Female | rural     | 2·8                                         | ND                   | ND                  | ND                    | 0     |                                                  | T1N0M0     | 1     | 1     |
| BC18           | Female | urban     | 8·4                                         | ND                   | ND                  | ND                    | 0     |                                                  | NA         |       | 1     |
| BC06           | Male   | rural     | 9·8                                         | C228T                | 20·4                | 16·5                  | 0     |                                                  | T4aN2M1a 4 | 4     | 3     |
| BC24           | Male   | rural     | 7·3                                         | C228T                | 0·7                 | 0·5                   | 0     |                                                  | T2N0M0     | 2     | 3     |
| BC08           | Male   | rural     | 0·4                                         | ND                   | ND                  | ND                    | 1     | Bladder Cancer                                   | T2N0M0     | 2     | 3     |
| BC17           | Female | rural     | 8·7                                         | C250T                | 20·3                | 12·3                  | 0     |                                                  | NA         | 3     | 3     |
| BC11           | Male   | rural     | 0·9                                         | ND                   | ND                  | ND                    | 1     | Bladder Cancer                                   | T1 OR T2   | 1     | 1     |
| BC01           | Male   | rural     | 9·3                                         | ND                   | ND                  | ND                    | 1     | Bladder Cancer                                   | T2N0M0     | 2     | 3     |
| BC10           | Male   | rural     | 5·6                                         | C228T                | 5·0                 | 2·2                   | 1     | Bladder Cancer                                   | TxNxM1     | 4     | 3     |
| BC04           | Male   | rural     | 2·9                                         | C228T                | 50·6                | 33·4                  | 1     | Bladder Cancer                                   | T2NxM1     | 4     | 3     |
| BC20           | Male   | rural     | 4·2                                         | C250T                | 15·3                | 3·2                   | 1     | Bladder Cancer                                   | T3NxM0     | 3A    | 3     |
| BC30           | Male   | rural     | 1·1                                         | C228T                | 51·0                | 32·7                  | 0     |                                                  | T1N0M0     | 1     | 1     |
| BC28           | Male   | rural     | 2·8                                         | C228T                | 32·9                | 22·4                  | 0     |                                                  | T1N0M0     | 1     | 1     |
| BC13           | Female | rural     | 2·3                                         | ND                   | ND                  | ND                    | 1     | Bladder Cancer                                   | NA         |       |       |
| BC07           | Male   | rural     | 5·4                                         | C228T                | 73·3                | 59·1                  | 1     | Bladder Cancer                                   | T2N0M0     | 2     | 3     |
| BC23           | Female | rural     | 6·9                                         | ND                   | ND                  | ND                    | 0     |                                                  | NA         |       | 2     |

NA: Data not available.
